# Supplementary material
Source: PubMed Central journal article supplement (PMC3815523)
Supplement: NIHMS484831-supplement-1_si_001.pdf [file NIHMS484831-supplement-1_si_001.pdf]

## Supplementary material

### Anti-cancer flavonoids are mouse selective STING agonists

Sujeong Kim<sup>†1</sup>, Lingyin Li<sup>†1</sup>, Zoltan Maliga<sup>1</sup>, Qian Yin<sup>2</sup>, Hao Wu<sup>2</sup>

& Timothy J. Mitchison<sup>1\*</sup>

<sup>1</sup>Department of Systems Biology, Harvard Medical School, Boston, USA.

<sup>2</sup>Program in Cellular and Molecular Medicine, Boston Children's Hospital, Boston, USA.

† these authors contributed equally to this work

\* e-mail: [timothy\\_mitchison@hms.harvard.edu](mailto:timothy_mitchison@hms.harvard.edu)

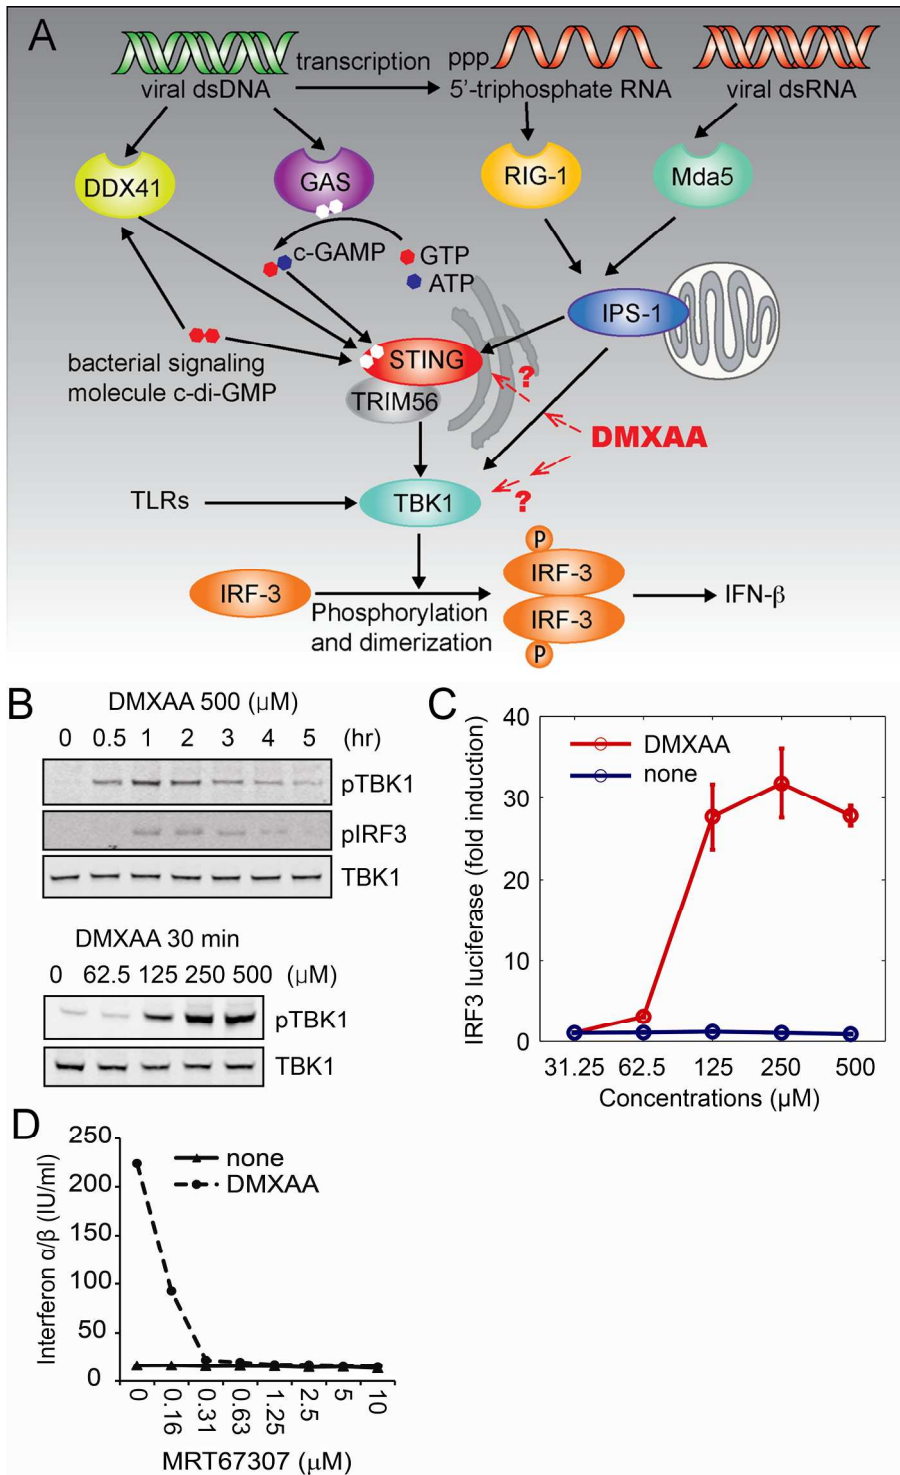

**Supplementary figure 1 | Studying the role of DMXAA in the STING mediated innate immune response.** (A) STING signaling network and potential targets for DMXAA. (B) Time course and dose studies of DMXAA activated TBK1 phosphorylation in Raw264.7 cells. (C) Dose studies of IRF3 activation in Raw264.7 cells. (D) Dose studies of TBK1 inhibitor, MRT67307 in DMXAA (500 $\mu\text{M}$ ) treated Raw264.7 cells.

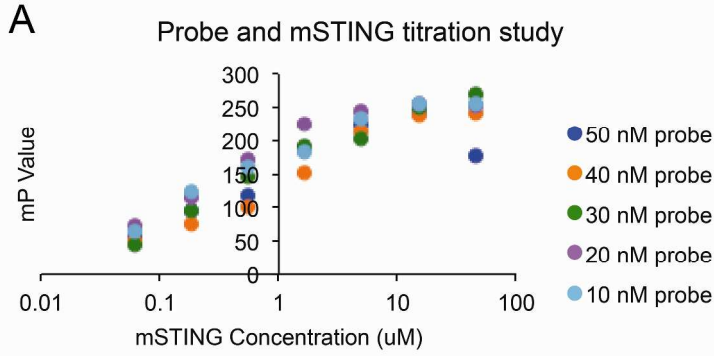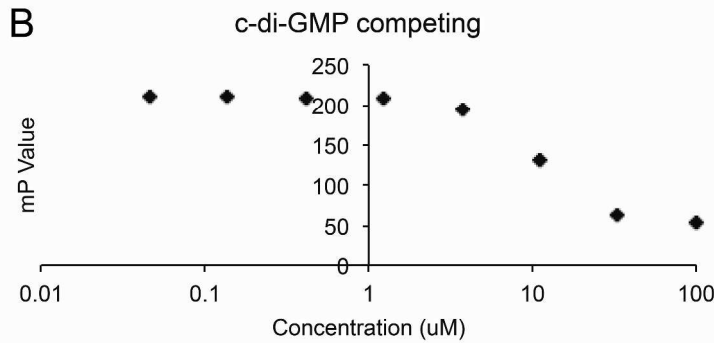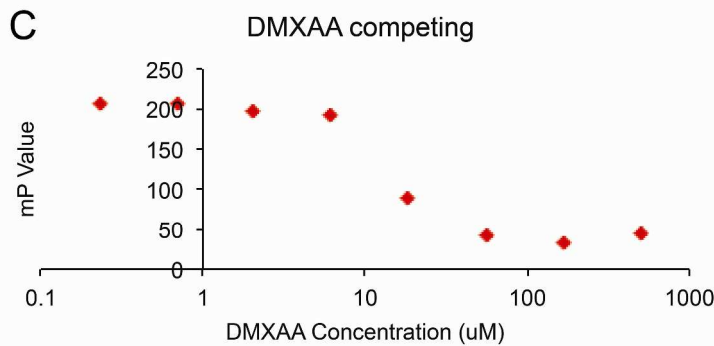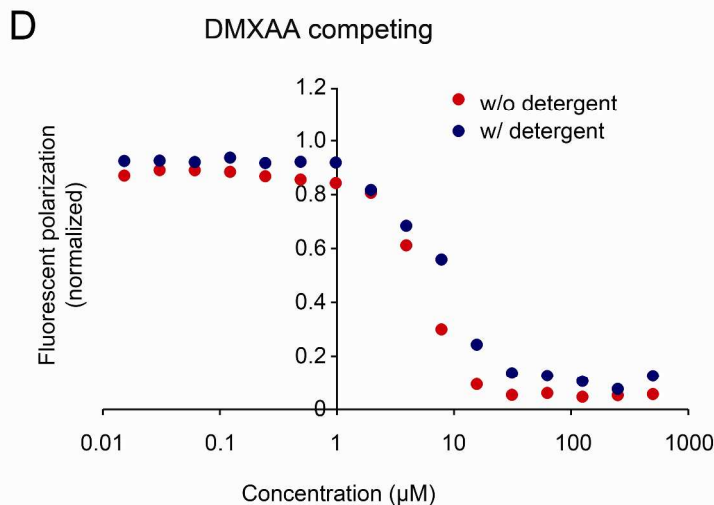

**Supplementary figure 2| Competition studies using fluorescence polarization assays.** (A) Probe and mSTING titration studies. (B) C-di-GMP competing with the fluorescein-labeled probe. (C) DMXAA competing with the probe. (D) DMXAA competing with the probe with or without detergent (0.01% (v/v) TritonX-100).

A

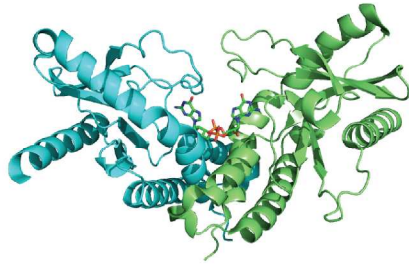

human STING WT CTD:c-di-GMP  
PDB: 4F5Y

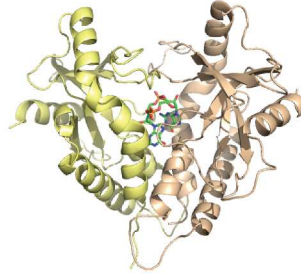

mouse STING CTD:c-di-GMP  
PDB: 4G4D

B

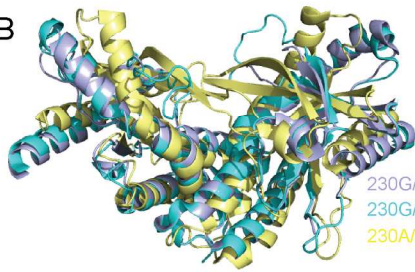

230G/232H PDB:4EF4  
230G/232R pDB: 4F5Y  
230A/232R PDB:4F5D

**Supplementary figure 3 | Investigating the binding ability of DMXAA to hSTING variants.** (A) Structural comparison of hSTING-CTD and mSTING-CTD. (B) Structural comparison of natural occurring hSTING variants.
